# Supplementary material for: Efficacy of Antibody to PNAG Against Keratitis Caused by Fungal Pathogens
Source: PubMed Central journal article supplement — Invest Ophthalmol Vis Sci. 2016 Dec;57(15):6797–804. doi: 10.1167/iovs.16-20358 (PMC5215555; doi:10.1167/iovs.16-20358), 2016-12
Supplement: iovs-57-15-10_s01.pdf [file iovs-57-15-10_s01.pdf]

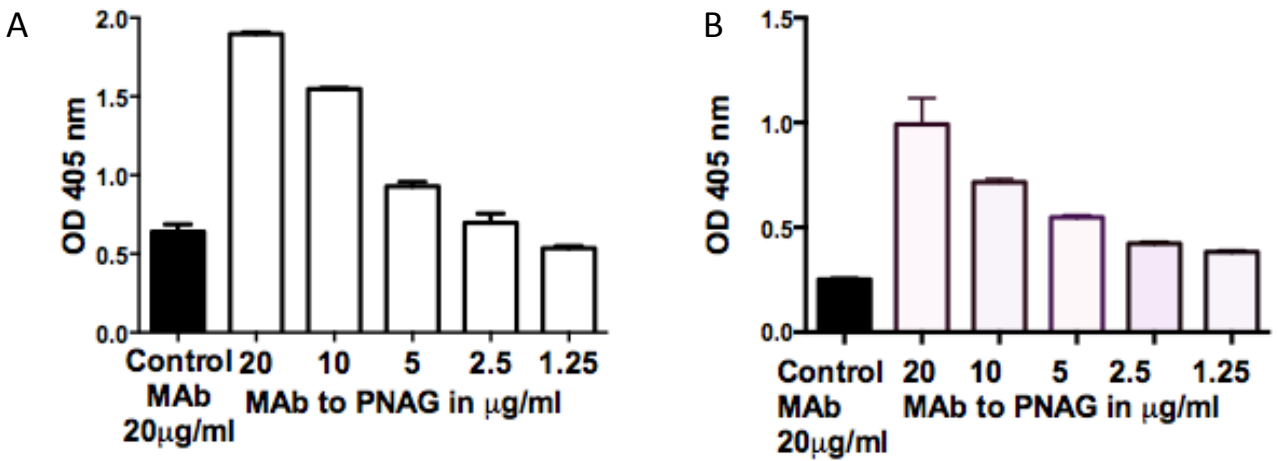

**FIGURE S1.** MAb F598 to PNAG binds to *A. flavus* or *F. solani* in a dose dependent manner.

ELISA assay for detection of the expression of PNAG directly on cells of *A. flavus* (**A**) or *F. solani* (**B**) used to coat wells in 96-well plates. Bars indicate means of triplicate samples, and error bars indicate the SEM.

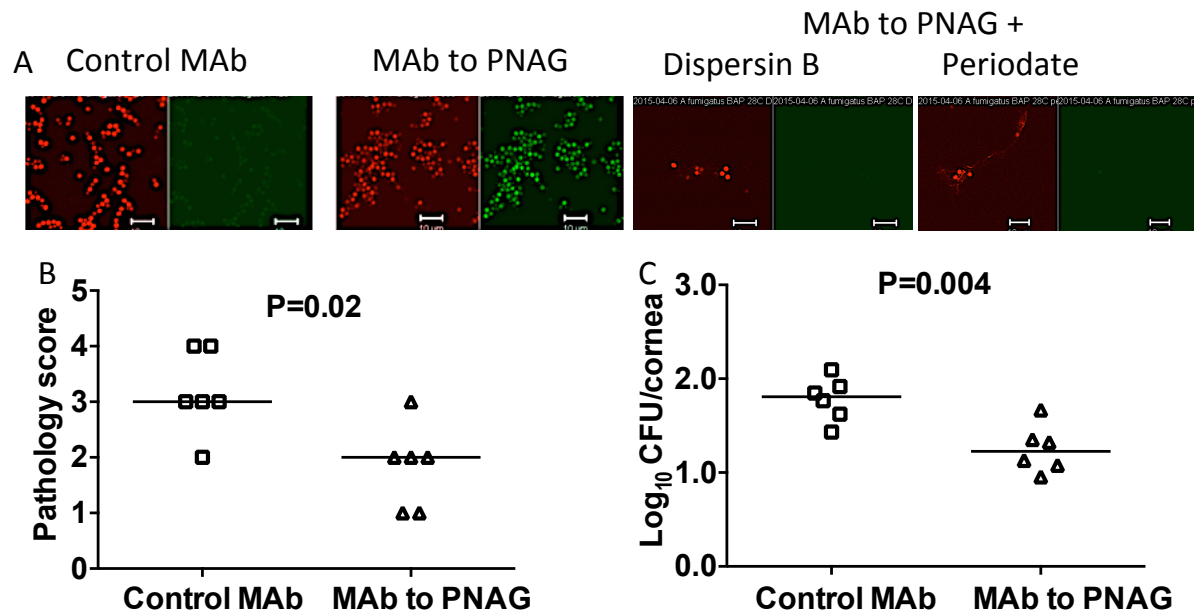

**FIGURE S2. Expression of PNAG and protective efficacy of antibody to PNAG against *A.***

***fumigatus* corneal infection.** A. Confocal immunofluorescent microscopy for detection of PNAG expression via binding of MAb F598. Red=Syto 83 dye for DNA; Green=binding of Alexa Fluor 488-labeled MAb F598 to PNAG. If PNAG is expressed, MAb binding is lost when cells are digested with either Dispersin B or periodate. B and C. 300  $\mu\text{g}$  of MAb was injected IP 4 h post-infection along with 10  $\mu\text{g}$  of MAb applied topically at 4, 24 and 32 h post-infection with *A. fumigatus*. Post-infection pathology scores and CFU/cornea were determined at 48 h. Symbols represent individual animals, bars the medians and P values determined by non-parametric T tests.
